# Supplementary material
Source: publisher site journal article supplement (https://www.dovepress.com/article/348565)
Supplement: Supplementary file 1 [file get_supplementary_file.php]

**Table S1**. miRNA altered pattern in TCGA prostate adenocarcinoma patient cohort

| miRNA | **FC (abs)** | p-value |
| --- | --- | --- |
| hsa-miR-23c | **-7,528657** | 2,03E-38 |
| hsa-miR-187-3p | **-5,448512** | 2,98E-17 |
| hsa-miR-891b | **-5,094921** | 3,17E-04 |
| hsa-miR-184 | **-4,333751** | 1,95E-13 |
| hsa-miR-892b | **-4,067009** | 0,001161 |
| hsa-miR-490-3p | **-3,975848** | 2,67E-08 |
| hsa-miR-888-5p | **-3,127298** | 1,99E-04 |
| hsa-miR-133b | **-3,097063** | 1,80E-18 |
| hsa-miR-221-5p | **-2,447566** | 4,79E-12 |
| hsa-miR-892a | **-2,424558** | 9,34E-05 |
| hsa-miR-221-3p | **-2,364731** | 3,34E-19 |
| hsa-miR-675-3p | **-2,323226** | 2,81E-05 |
| hsa-miR-205-5p | **-2,278794** | 3,39E-04 |
| hsa-miR-136-3p | **-2,176211** | 3,18E-11 |
| hsa-miR-1224-3p | **-2,166577** | 0,019329 |
| hsa-miR-1224-5p | **-2,082526** | 1,46E-04 |
| hsa-miR-144-3p | **-2,064833** | 6,41E-07 |
| hsa-miR-143-3p | **-2,053271** | 4,76E-21 |
| hsa-miR-891a-5p | **-2,03044** | 5,09E-05 |
| hsa-miR-338-5p | **-2,022299** | 6,21E-09 |
| hsa-miR-873-5p | **-2,015047** | 4,28E-06 |
| hsa-miR-204-5p | **-1,997876** | 2,80E-09 |
| hsa-miR-222-3p | **-1,933521** | 7,77E-13 |
| hsa-miR-145-3p | **-1,883318** | 3,20E-18 |
| hsa-miR-326 | **-1,860905** | 1,29E-07 |
| hsa-miR-143-5p | **-1,842061** | 3,22E-06 |
| hsa-miR-450b-5p | **-1,81599** | 4,77E-06 |
| hsa-miR-378c | **-1,753335** | 6,78E-12 |
| hsa-miR-496 | **-1,734487** | 5,36E-07 |
| hsa-miR-1258 | **-1,699294** | 1,10E-04 |
| hsa-miR-889-3p | **-1,693572** | 7,58E-10 |
| hsa-miR-222-5p | **-1,672989** | 5,48E-08 |
| hsa-miR-490-5p | **-1,654138** | 0,01487 |
| hsa-miR-10a-3p | **-1,640165** | 6,49E-04 |
| hsa-miR-331-3p | **-1,63227** | 3,62E-05 |
| hsa-miR-212-3p | **-1,617389** | 3,97E-08 |
| hsa-miR-542-5p | **-1,616026** | 9,50E-05 |
| hsa-miR-514a-3p | **-1,611024** | 0,005374 |
| hsa-miR-541-5p | **-1,609659** | 0,016509 |
| hsa-miR-493-3p | **-1,597574** | 1,74E-05 |
| hsa-miR-27b-3p | **-1,590511** | 1,51E-16 |
| hsa-miR-129-5p | **-1,574616** | 0,003567 |
| hsa-miR-330-3p | **-1,568589** | 3,64E-07 |
| hsa-miR-381-3p | **-1,562132** | 1,27E-08 |
| hsa-miR-488-3p | **-1,549151** | 0,001347 |
| hsa-miR-944 | **-1,545129** | 7,99E-04 |
| hsa-miR-296-5p | **-1,538177** | 5,52E-04 |
| hsa-miR-152-3p | **-1,535926** | 6,13E-13 |
| hsa-miR-323b-3p | **-1,53437** | 0,003846 |
| hsa-miR-23b-3p | **-1,51362** | 3,51E-12 |
| hsa-miR-379-5p | **-1,511996** | 7,02E-09 |
| hsa-miR-760 | **-1,502978** | 8,30E-05 |
| hsa-miR-452-5p | **-1,500565** | 9,96E-08 |
| hsa-miR-375 | **8,420016** | 0 |
| hsa-miR-182-5p | **5,944577** | 0 |
| hsa-miR-96-5p | **5,917676** | 0 |
| hsa-miR-153-3p | **5,549769** | 6,05E-35 |
| hsa-miR-183-5p | **5,319185** | 0 |
| hsa-miR-200c-3p | **4,102743** | 0 |
| hsa-miR-93-5p | **4,062534** | 0 |
| hsa-miR-92a-1-5p | **3,931775** | 1,55E-19 |
| hsa-miR-20a-3p | **3,815577** | 1,85E-29 |
| hsa-miR-708-5p | **3,789605** | 8,23E-31 |
| hsa-miR-20a-5p | **3,63088** | 9,90E-33 |
| hsa-miR-148a-3p | **3,601601** | 0 |
| hsa-miR-141-3p | **3,458836** | 6,34E-28 |
| hsa-miR-106a-5p | **3,389355** | 8,39E-23 |
| hsa-miR-423-5p | **3,382125** | 9,28E-43 |
| hsa-miR-3648 | **3,380598** | 4,42E-12 |
| hsa-miR-17-5p | **3,361455** | 8,64E-35 |
| hsa-miR-425-5p | **3,353403** | 3,25E-34 |
| hsa-miR-592 | **3,323709** | 4,00E-10 |
| hsa-miR-449a | **3,268724** | 0,002886 |
| hsa-miR-146b-5p | **3,242689** | 4,34E-33 |
| hsa-miR-708-3p | **3,231473** | 7,98E-37 |
| hsa-miR-3651 | **3,159704** | 9,96E-08 |
| hsa-miR-615-3p | **3,032403** | 2,47E-05 |
| hsa-miR-19b-3p | **3,009713** | 2,06E-25 |
| hsa-miR-20b-5p | **2,97832** | 2,58E-16 |
| hsa-miR-500a-3p | **2,833497** | 4,19E-35 |
| hsa-miR-93-3p | **2,825086** | 1,83E-21 |
| hsa-miR-25-3p | **2,799552** | 0 |
| hsa-miR-4326 | **2,756618** | 7,14E-14 |
| hsa-miR-92a-3p | **2,74744** | 3,84E-40 |
| hsa-miR-7-1-3p | **2,741171** | 3,42E-29 |
| hsa-miR-501-3p | **2,713763** | 3,35E-25 |
| hsa-miR-211-5p | **2,528545** | 0,005971 |
| hsa-miR-3653-3p | **2,491735** | 1,24E-13 |
| hsa-miR-362-5p | **2,489719** | 3,80E-16 |
| hsa-miR-19a-3p | **2,484222** | 2,32E-13 |
| hsa-miR-146b-3p | **2,478198** | 5,05E-24 |
| hsa-miR-191-5p | **2,43624** | 3,24E-31 |
| hsa-miR-1307-3p | **2,426429** | 1,96E-27 |
| hsa-miR-7-5p | **2,420305** | 3,64E-08 |
| hsa-miR-3927-3p | **2,392694** | 0,023097 |
| hsa-miR-141-5p | **2,391312** | 2,00E-30 |
| hsa-miR-200c-5p | **2,388868** | 1,57E-17 |
| hsa-miR-342-3p | **2,38714** | 1,34E-32 |
| hsa-miR-18a-5p | **2,375597** | 3,63E-15 |
| hsa-miR-19b-1-5p | **2,363432** | 4,60E-19 |
| hsa-miR-126-3p | **2,35987** | 4,09E-21 |
| hsa-miR-3065-3p | **2,344415** | 1,07E-14 |
| hsa-miR-618 | **2,337934** | 3,99E-05 |
| hsa-miR-671-5p | **2,31278** | 4,38E-14 |
| hsa-miR-103a-3p | **2,310027** | 5,40E-43 |
| hsa-miR-210-3p | **2,294077** | 5,90E-06 |
| hsa-miR-223-5p | **2,287427** | 9,10E-10 |
| hsa-miR-20b-3p | **2,284663** | 2,45E-09 |
| hsa-miR-1275 | **2,279276** | 2,04E-05 |
| hsa-miR-199b-5p | **2,263941** | 5,49E-17 |
| hsa-miR-30b-3p | **2,237741** | 3,21E-15 |
| hsa-miR-30b-5p | **2,236541** | 1,55E-19 |
| hsa-miR-3607-3p | **2,23333** | 6,31E-07 |
| hsa-miR-3687 | **2,224568** | 2,25E-05 |
| hsa-miR-9-5p | **2,210876** | 9,36E-07 |
| hsa-miR-130b-5p | **2,210415** | 7,81E-14 |
| hsa-miR-660-5p | **2,208077** | 1,80E-18 |
| hsa-miR-3170 | **2,167966** | 6,98E-06 |
| hsa-miR-32-3p | **2,166418** | 2,37E-08 |
| hsa-miR-629-5p | **2,158906** | 6,29E-23 |
| hsa-miR-342-5p | **2,154334** | 1,58E-16 |
| hsa-miR-1291 | **2,129854** | 4,67E-06 |
| hsa-miR-651-5p | **2,097328** | 1,09E-11 |
| hsa-miR-135a-5p | **2,091765** | 2,45E-09 |
| hsa-miR-29b-1-5p | **2,088936** | 1,54E-10 |
| hsa-miR-454-3p | **2,068416** | 6,04E-16 |
| hsa-miR-935 | **2,067134** | 1,01E-05 |
| hsa-miR-3065-5p | **2,057096** | 8,24E-08 |
| hsa-miR-1301-3p | **2,055202** | 3,73E-14 |
| hsa-miR-148b-5p | **2,051957** | 1,01E-11 |
| hsa-miR-3619-5p | **2,047406** | 0,025377 |
| hsa-miR-21-5p | **2,046904** | 6,61E-26 |
| hsa-miR-196b-3p | **2,036328** | 1,18E-07 |
| hsa-miR-106b-5p | **2,036018** | 9,44E-23 |
| hsa-miR-148a-5p | **2,032626** | 4,63E-18 |
| hsa-miR-137 | **2,031054** | 0,005123 |
| hsa-miR-664a-5p | **2,024368** | 3,45E-19 |
| hsa-miR-629-3p | **2,012174** | 6,21E-09 |
| hsa-miR-17-3p | **2,011731** | 3,19E-22 |
| hsa-miR-194-3p | **2,010585** | 1,32E-07 |
| hsa-miR-130b-3p | **2,009574** | 4,06E-15 |
| hsa-miR-363-5p | **1,99913** | 2,76E-05 |
| hsa-miR-363-3p | **1,994248** | 3,54E-10 |
| hsa-miR-491-5p | **1,992283** | 2,19E-10 |
| hsa-miR-320a | **1,991241** | 7,45E-20 |
| hsa-miR-423-3p | **1,987927** | 5,94E-21 |
| hsa-miR-151a-5p | **1,985519** | 2,41E-24 |
| hsa-miR-491-3p | **1,982341** | 1,22E-08 |
| hsa-miR-339-5p | **1,975386** | 9,01E-12 |
| hsa-miR-1266-5p | **1,957875** | 6,53E-10 |
| hsa-miR-203a-3p | **1,950292** | 2,82E-13 |
| hsa-miR-484 | **1,949308** | 1,09E-16 |
| hsa-miR-576-5p | **1,942977** | 2,32E-13 |
| hsa-miR-335-5p | **1,941583** | 2,03E-11 |
| hsa-miR-3614-3p | **1,935285** | 1,72E-04 |
| hsa-miR-96-3p | **1,933401** | 0,006859 |
| hsa-miR-103a-2-5p | **1,927977** | 4,05E-07 |
| hsa-miR-1296-5p | **1,923483** | 1,49E-10 |
| hsa-miR-197-3p | **1,922675** | 2,09E-20 |
| hsa-miR-653-5p | **1,92217** | 4,07E-08 |
| hsa-miR-548t-5p | **1,908983** | 1,29E-04 |
| hsa-miR-15a-5p | **1,893719** | 3,12E-17 |
| hsa-miR-409-5p | **1,883318** | 2,57E-08 |
| hsa-miR-32-5p | **1,88108** | 5,61E-11 |
| hsa-miR-30d-3p | **1,880505** | 2,38E-15 |
| hsa-miR-29c-5p | **1,8767** | 3,12E-17 |
| hsa-miR-15b-5p | **1,862077** | 1,06E-19 |
| hsa-miR-106a-3p | **1,858766** | 1,44E-05 |
| hsa-miR-3200-3p | **1,843946** | 1,92E-07 |
| hsa-let-7a-3p | **1,840476** | 2,52E-16 |
| hsa-miR-663a | **1,83936** | 0,012204 |
| hsa-miR-503-5p | **1,837223** | 1,85E-04 |
| hsa-miR-1284 | **1,836509** | 0,005117 |
| hsa-miR-2115-5p | **1,82981** | 0,009075 |
| hsa-miR-190b | **1,829064** | 7,07E-05 |
| hsa-miR-1228-5p | **1,807916** | 5,44E-04 |
| hsa-miR-589-3p | **1,799025** | 1,33E-06 |
| hsa-miR-3164 | **1,798971** | 0,008145 |
| hsa-miR-769-3p | **1,795609** | 1,22E-06 |
| hsa-miR-627-5p | **1,794033** | 4,96E-07 |
| hsa-miR-18b-5p | **1,788709** | 2,61E-05 |
| hsa-miR-1976 | **1,783401** | 6,96E-14 |
| hsa-miR-10b-5p | **1,782146** | 1,47E-09 |
| hsa-let-7f-5p | **1,778061** | 4,90E-16 |
| hsa-miR-3117-3p | **1,770347** | 4,10E-06 |
| hsa-miR-532-5p | **1,762347** | 2,89E-14 |
| hsa-miR-589-5p | **1,755706** | 1,13E-16 |
| hsa-miR-181a-3p | **1,753785** | 2,49E-13 |
| hsa-let-7a-5p | **1,752199** | 2,97E-26 |
| hsa-miR-30d-5p | **1,740663** | 2,52E-16 |
| hsa-miR-196b-5p | **1,738936** | 1,53E-10 |
| hsa-miR-29b-2-5p | **1,730388** | 8,15E-14 |
| hsa-miR-3607-5p | **1,727764** | 0,003086 |
| hsa-miR-21-3p | **1,723075** | 3,56E-08 |
| hsa-miR-616-5p | **1,71554** | 1,69E-04 |
| hsa-miR-2115-3p | **1,712544** | 0,04809 |
| hsa-miR-664a-3p | **1,706295** | 1,02E-13 |
| hsa-miR-590-5p | **1,706178** | 4,06E-09 |
| hsa-miR-3130-3p | **1,706164** | 4,46E-04 |
| hsa-miR-532-3p | **1,700245** | 2,45E-09 |
| hsa-let-7d-5p | **1,696577** | 6,40E-19 |
| hsa-miR-502-5p | **1,694561** | 2,17E-06 |
| hsa-miR-9-3p | **1,688844** | 3,39E-04 |
| hsa-miR-580-3p | **1,688518** | 2,76E-05 |
| hsa-miR-1304-5p | **1,682136** | 0,002619 |
| hsa-miR-625-3p | **1,68173** | 7,35E-14 |
| hsa-miR-30c-5p | **1,679313** | 3,60E-12 |
| hsa-miR-3678-3p | **1,672896** | 0,037193 |
| hsa-miR-26b-5p | **1,664208** | 3,97E-17 |
| hsa-miR-548s | **1,652477** | 2,87E-04 |
| hsa-miR-3138 | **1,651763** | 0,030716 |
| hsa-miR-500a-5p | **1,647879** | 2,52E-07 |
| hsa-miR-149-3p | **1,647598** | 0,001996 |
| hsa-miR-500b-5p | **1,647499** | 2,59E-07 |
| hsa-miR-485-5p | **1,643941** | 1,44E-04 |
| hsa-miR-744-3p | **1,642648** | 1,84E-06 |
| hsa-miR-3613-5p | **1,641686** | 1,80E-07 |
| hsa-miR-34b-5p | **1,639712** | 0,002145 |
| hsa-miR-140-5p | **1,638403** | 3,88E-19 |
| hsa-miR-18b-3p | **1,63781** | 0,015537 |
| hsa-miR-486-3p | **1,630593** | 0,001947 |
| hsa-miR-95-3p | **1,63043** | 1,79E-06 |
| hsa-miR-578 | **1,621718** | 0,019761 |
| hsa-miR-15b-3p | **1,620958** | 4,85E-09 |
| hsa-miR-582-3p | **1,620263** | 1,17E-06 |
| hsa-miR-429 | **1,616037** | 0,005269 |
| hsa-miR-3613-3p | **1,612153** | 2,67E-05 |
| hsa-miR-548e-3p | **1,611366** | 0,001192 |
| hsa-miR-511-5p | **1,60547** | 5,11E-07 |
| hsa-miR-943 | **1,601091** | 0,01811 |
| hsa-miR-570-3p | **1,598611** | 0,004808 |
| hsa-miR-877-5p | **1,593141** | 5,22E-04 |
| hsa-miR-1249-3p | **1,592878** | 5,82E-05 |
| hsa-miR-16-1-3p | **1,582879** | 2,79E-06 |
| hsa-miR-1277-3p | **1,579209** | 0,001935 |
| hsa-miR-142-3p | **1,576046** | 4,13E-04 |
| hsa-miR-361-5p | **1,575372** | 1,60E-21 |
| hsa-miR-155-5p | **1,571479** | 3,22E-06 |
| hsa-miR-191-3p | **1,569201** | 0,001072 |
| hsa-miR-149-5p | **1,568777** | 7,30E-05 |
| hsa-miR-548v | **1,568474** | 1,11E-04 |
| hsa-miR-217 | **1,567015** | 9,30E-04 |
| hsa-miR-512-3p | **1,555596** | 0,043648 |
| hsa-miR-616-3p | **1,553439** | 0,001449 |
| hsa-miR-219a-1-3p | **1,54962** | 1,37E-05 |
| hsa-miR-495-3p | **1,546845** | 2,88E-07 |
| hsa-miR-200a-5p | **1,539918** | 0,007583 |
| hsa-miR-3614-5p | **1,539005** | 0,010619 |
| hsa-miR-625-5p | **1,53621** | 9,75E-05 |
| hsa-miR-335-3p | **1,536052** | 3,05E-06 |
| hsa-miR-374a-3p | **1,531754** | 3,18E-11 |
| hsa-miR-92b-5p | **1,529949** | 0,010188 |
| hsa-miR-885-5p | **1,528695** | 0,011049 |
| hsa-let-7g-5p | **1,528349** | 4,27E-17 |
| hsa-miR-33a-3p | **1,527194** | 5,47E-04 |
| hsa-miR-16-2-3p | **1,525012** | 8,19E-05 |
| hsa-miR-340-3p | **1,513517** | 5,10E-08 |
| hsa-miR-195-3p | **1,513093** | 2,37E-08 |
| hsa-miR-2110 | **1,512478** | 5,44E-04 |
| hsa-miR-140-3p | **1,506593** | 3,54E-15 |
| hsa-miR-150-3p | **1,506282** | 0,002473 |

| miRNA name | FC (abs) | p- value |
| --- | --- | --- |
| hsa-miR-4697-5p | **-**12,16472 | 6,04E-05 |
| hsa-miR-4651 | **-**6,335893 | 0,00299 |
| hsa-miR-4632-5p | **-**4,89219 | 0,003732 |
| hsa-miR-1181 | **-**4,795216 | 0,008311 |
| hsa-miR-6857-5p | **-**4,073508 | 0,007914 |
| hsa-miR-1343-5p | **-**3,936996 | 0,017155 |
| hsa-miR-3131 | **-**3,822466 | 0,025134 |
| hsa-miR-6886-5p | **-**3,810598 | 0,015767 |
| hsa-miR-4481 | **-**3,725649 | 0,01341 |
| hsa-miR-4513 | **-**3,576752 | 0,024104 |
| hsa-miR-1228-3p | **-**3,568158 | 0,007564 |
| hsa-miR-4487 | **-**3,561595 | 0,018174 |
| hsa-miR-6887-5p | **-**3,558549 | 0,006501 |
| hsa-miR-6806-5p | **-**3,544742 | 0,02091 |
| hsa-miR-542-5p | **-**3,489259 | 0,023092 |
| hsa-miR-193b-5p | **-**3,473097 | 0,034086 |
| hsa-miR-6746-5p | **-**3,459481 | 0,019452 |
| hsa-miR-4486 | **-**3,42529 | 0,023854 |
| hsa-miR-5699-5p | **-**3,311005 | 0,04105 |
| hsa-miR-1249-3p | **-**3,191181 | 0,026677 |
| hsa-miR-6785-5p | **-**3,163657 | 0,034395 |
| hsa-miR-8087 | **-**3,160078 | 0,042924 |
| hsa-miR-3682-3p | **-**3,147737 | 0,045493 |
| hsa-miR-6893-5p | **-**3,09081 | 0,023071 |
| hsa-miR-4462 | **-**2,891969 | 0,025638 |
| hsa-miR-6848-5p | **-**2,86583 | 0,031509 |
| hsa-miR-4749-5p | **-**2,808125 | 0,048307 |
| hsa-miR-365a-5p | **-**2,784082 | 0,031548 |
| hsa-miR-513b-5p | **-**2,772138 | 0,047518 |
| hsa-miR-4721 | **-**2,770186 | 0,023318 |
| hsa-miR-575 | **-**2,713038 | 0,018436 |
| hsa-miR-4428 | **-**2,471773 | 0,03202 |
| hsa-miR-6132 | **-**2,462212 | 0,042448 |
| hsa-miR-1185-2-3p | **-**2,442012 | 0,024076 |
| hsa-miR-6769b-5p | **-**2,377922 | 0,041032 |
| hsa-miR-6780a-5p | **-**2,336346 | 0,022642 |
| hsa-miR-1236-5p | **-**2,314538 | 0,042407 |
| hsa-miR-6794-5p | **-**2,154999 | 0,043359 |
| hsa-miR-1914-3p | **-**2,094265 | 0,04237 |
| hsa-miR-4745-5p | **-**2,093499 | 0,042005 |
| hsa-miR-125a-3p | **-**2,0735 | 0,039453 |
| hsa-miR-4484 | **-**2,034169 | 0,048093 |
| hsa-miR-4515 | **-**2,005374 | 0,044187 |
| hsa-miR-6789-5p | **-**1,946246 | 0,048506 |
| hsa-miR-96-5p | 7,082081 | 0,011571 |
| hsa-miR-183-5p | 5,066973 | 0,017759 |
| hsa-miR-363-3p | 4,996131 | 0,010416 |
| hsa-miR-200a-3p | 4,633792 | 0,032662 |
| hsa-miR-182-5p | 4,501969 | 0,023746 |
| hsa-miR-6850-3p | 4,355418 | 0,001374 |
| hsa-miR-3149 | 3,891046 | 0,032597 |
| hsa-miR-6516-3p | 3,739337 | 0,015703 |
| hsa-miR-32-5p | 3,495687 | 0,017029 |
| hsa-miR-203a-3p | 3,44882 | 0,028174 |
| hsa-miR-20b-5p | 3,034953 | 0,047767 |
| hsa-miR-7-1-3p | 2,741461 | 0,046499 |
| hsa-miR-181a-3p | 2,576657 | 0,018402 |
| hsa-miR-449a | 2,479933 | 0,026792 |
| hsa-miR-30d-3p | 2,438428 | 0,040495 |
| hsa-miR-18b-5p | 2,303719 | 0,038016 |

Table S2. miRNA altered patter in UMPh prostate adenocarcinoma patient cohort

Table S3. miR-20b-5p, miR-96-5p, miR-183-5p and miR-543-5p target genes

| Target genes (Diana Tools, mirPath v.3) | | | |
| --- | --- | --- | --- |
| miR-20b-5p | miR-96-5p | miR-183-5p | miR-542-5p |
| ARHGAP1 | CALU | CALU | FASN |
| CCNT2 | TMSB10 | RNF41 | IGFBP5 |
| POLR2B | FZD7 | VAPB | DTL |
| SLK | EFNB2 | NDUFS2 | CSNK2A2 |
| CELF2 | CCNT2 | RPA1 | ITGB1 |
| TBC1D20 | DDI2 | PFN1 | SSR1 |
| TAOK3 | RAB2B | AK2 | ZBTB38 |
| CAMTA1 | CAMTA1 | KLHL28 | RHOBTB3 |
| KCNH8 | PFN1 | BRAF | SH3PXD2A |
| C16orf52 | CAMK2D | ACTB | RASA2 |
| KLHL28 | HGSNAT | EAF1 | ATP11C |
| ANP32E | STK17A | NACA | AKIRIN2 |
| ADAM9 | CCNG1 | PRLR | THBS2 |
| ACTB | EAF1 | BRI3BP | GAPDH |
| STK17A | ATCAY | PCNXL4 | SMURF2 |
| PRLR | LONRF3 | EGR1 | XRCC1 |
| BRI3BP | PRLR | FOS | KDM4B |
| FOXJ2 | LRP10 | NETO2 | PPP1CC |
| BSCL2 | CNOT6 | TROAP | ETFDH |
| MSI2 | CRTC3 | FAM195A | PGPEP1 |
| TBC1D15 | CTDSP1 | SNRPD3 | CDH11 |
| ERAP1 | SOX4 | HIPK2 | PKD1 |
| CNOT6 | MCOLN2 | TMED8 | HBP1 |
| TMED8 | ESYT1 | SCYL3 | HIPK3 |
| MICA | RBL2 | CTDSP1 | KIF13A |
| BTN3A1 | MFAP3 | PDPR | SERPINB7 |
| BRWD3 | COA4 | SLC15A4 | PRPF19 |
| FAM120A | DAZAP2 | FBXO11 | PSMD3 |
| GPR63 | PHF19 | DNAH3 | DNAJC5 |
| SOX4 | SIN3B | KYNU | ARFGEF2 |
| ARAP2 | CDK7 | UBXN7 | NGFRAP1 |
| ARL4A | ENC1 | BRMS1L | KDM2A |
| FBXL3 | UGCG | ENC1 | NARS |
| RBL2 | SAR1A | PCNA | MAGED1 |
| OTUD1 | STIP1 | EPRS | PGAP2 |
| C9orf40 | EPRS | TNPO1 | CHD4 |
| UBXN7 | HPCAL1 | TOX4 | DENND1A |
| DAZAP2 | TNPO1 | BECN1 | DPP9 |
| SLC48A1 | ELL2 | G3BP1 | ASH1L |
| SCAMP2 | RPS23 | RPS23 | HSPG2 |
| NFKBIZ | ZSCAN25 | PDCD4 | PURB |
| MYBL1 | TGFBR1 | KIAA1731 | GRN |
| CWF19L1 | MORF4L1 | FBXO32 | TRIM14 |
| BRMS1L | ADAM10 | IRF4 | RIF1 |
| STAT3 | ERBB2 | LRP6 | B4GALT1 |
| ERBB2IP | ARPC5L | ATP6V0E1 | SLC20A2 |
| PTPRK | NFKB1 | SLC6A6 | ILF3 |
| EFCAB14 | FEM1B | TROVE2 | CTNNB1 |
| ARFGEF1 | LRP6 | SLC39A8 | MSL1 |
| NBL1 | RAP2B | SRSF9 | RNF24 |
| ELL2 | ZBTB11 | C14orf1 | HIC1 |
| C2CD3 | MEGF9 | MEGF9 | METTL16 |
| G3BP1 | GRB10 | ITGB1 | LDHA |
| E2F1 | USP53 | RPL17 | C6orf89 |
| PFKP | TTYH3 | ARMCX5 | PPP1R12C |
| MASTL | ITGB1 | CCNB1 | ADNP |
| ASB1 | CCNB1 | TTL | MPRIP |
| FAM167A | BCL9 | TRNT1 | GRAMD1A |
| WDR1 | TACC1 | NUP62 | GAPVD1 |
| UNKL | TTC39B | RPF1 | SLC6A9 |
| FEM1B | WASL | CEP97 | KIF18B |
| ARID3A | DDHD1 | EZR | FN1 |
| ATP6V0E1 | TPD52 | YAP1 | MYCN |
| KIF14 | ZBTB44 | C1orf43 | SCYL1 |
| RRAGD | ZIC2 | PACS1 | AHNAK |
| UEVLD | LMBRD1 | FPGS | ZNF367 |
| ANO6 | BSDC1 | RNF38 | PPIF |
| CCNB1 | ATF2 | DBI | XRCC5 |
| UBE2Q2 | NUCKS1 | ITGB8 | RNF213 |
| CIC | RDH11 | PCSK6 | PATL1 |
| WNK3 | RIOK3 | CDK4 | DUSP1 |
| FBXL5 | IARS | ATF2 | KIF5B |
| CYSTM1 | KIAA1324 | HIST1H2AI | VAMP2 |
| CEP97 | RAD23B | BRD2 | RP5-850E9.3 |
| TACC1 | ABCA2 | CBL | TMEM189-UBE2V1 |
| RPL10A | USP25 | PPP1R16A | RNF115 |
| HMGB3 | ARL2 | TTF2 |  |
| AREL1 | BRD2 | HNRNPA1 |  |
| C1orf43 | USP36 | ARHGAP11A |  |
| ATXN7L3 | FRMD4A | CBX2 |  |
| TMEM200C | CBX2 | CDK2AP2 |  |
| RUSC1 | RBM12 | MGAT5 |  |
| ZNF827 | BCAT2 | NRAS |  |
| ACSL3 | LPHN2 | NLRP2 |  |
| PGAP1 | STX10 | CRKL |  |
| ANKRD11 | CD59 | SORL1 |  |
| ITGB8 | PRRC1 | ATXN1L |  |
| FAM126B | YWHAE | STK4 |  |
| CXCL8 | TSC22D3 | DGKE |  |
| ATF2 | FYCO1 | VTA1 |  |
| GZF1 | KIF1B | TET1 |  |
| RAPGEF1 | SPPL2A | PRRC1 |  |
| NUCKS1 | FAM111B | ELK4 |  |
| GPR137B | RIC8B | CLIC4 |  |
| SPATA7 | SH3BP5 | NPRL3 |  |
| SCD5 | RAI1 | CDC37L1 |  |
| PREX1 | LZIC | AMDHD2 |  |
| SMAD2 | UCK2 | RIC8B |  |
| SH3PXD2A | MAP3K3 | ERO1L |  |
| SMAD6 | WARS | TBC1D2B |  |
| USP25 | LAMA5 | YOD1 |  |
| C11orf95 | BRPF3 | ZDHHC14 |  |
| TTF2 | SLC25A3 | SSH1 |  |
| SH2B3 | SRP54 | WDR75 |  |
| FRMD4A | VPS13D | ARRDC4 |  |
| KBTBD8 | TRIM37 | EIF3H |  |
| CBX2 | CFL1 | TDRD7 |  |
| CMTM3 | WWP1 | SPATA33 |  |
| MAST4 | SIRT1 | GTF3C4 |  |
| TMEM33 | SLC35G1 | ZNF780B |  |
| MTERFD2 | VTCN1 | ATF6B |  |
| LRCH1 | THBS1 | LGR4 |  |
| H2AFX | NLN | AGO3 |  |
| IRF9 | TMEM167A | PIP5K1C |  |
| DUSP2 | EIF3H | NCOA7 |  |
| ATXN2L | GTF3C4 | PRRG4 |  |
| HP1BP3 | CEP85L | CLCN3 |  |
| CNOT4 | ITGA8 | LENG8 |  |
| ZNF19 | DHCR24 | TMEM14A |  |
| RASA2 | ZNF681 | FKBP4 |  |
| CRIM1 | PAK2 | MTUS1 |  |
| UNC119B | ANKRD52 | ELK3 |  |
| ELK4 | SPATA2 | PPP2CA |  |
| FYCO1 | MTUS1 | CAV1 |  |
| MSMO1 | REST | B4GALT5 |  |
| CYR61 | PPP2CA | MED21 |  |
| CDC37L1 | HOOK3 | TCF7L2 |  |
| ACER3 | SMARCA4 | PLAGL2 |  |
| TMED7-TICAM2 | GTF3C3 | USP1 |  |
| RCAN1 | GNPDA1 | ATG2B |  |
| GNS | MCM6 | RNF103 |  |
| HNRNPD | MED21 | E2F8 |  |
| LZIC | TCF7L2 | ATAD1 |  |
| MAGEF1 | MTX3 | LGR5 |  |
| TBC1D2B | VSIG10 | LANCL1 |  |
| ZNFX1 | UTP6 | YWHAG |  |
| YOD1 | YIPF6 | PPP1CC |  |
| CRK | SYK | MCL1 |  |
| KIAA1598 | AP2B1 | PTPN4 |  |
| ARMC8 | RSF1 | HIST1H2BC |  |
| SIK1 | TAF2 | TIMM8B |  |
| TMEM167A | CHMP1B | TMEM98 |  |
| HMGA2 | TIMMDC1 | GNA13 |  |
| VANGL1 | sept.11 | DTWD1 |  |
| GTF3C4 | XRCC6 | CAPNS1 |  |
| DAB2 | OGT | PCK2 |  |
| MAPK7 | IDS | RABGAP1 |  |
| LGR4 | ATAD1 | MKL2 |  |
| KIAA1522 | RAB40B | TM9SF3 |  |
| DHCR24 | HBS1L | TOMM20 |  |
| TBC1D9 | FAM46C | AUTS2 |  |
| PAK2 | YWHAG | PERP |  |
| TRIM8 | SEC23A | EIF5A |  |
| ATAD2 | MCL1 | ROCK2 |  |
| HSD17B7 | TIMM8B | ARPP19 |  |
| EDEM2 | PROK2 | PDE3A |  |
| SLC25A37 | SCLY | SERGEF |  |
| ANKRD52 | ZDHHC5 | AKAP9 |  |
| SAMD8 | CCND2 | SPRED1 |  |
| REST | RAB7A | PTTG1IP |  |
| SETD7 | CAPNS1 | DYNC1H1 |  |
| CREB5 | TBX3 | HS2ST1 |  |
| B4GALT5 | SMARCA2 | PKM |  |
| NPAT | ADSS | HUWE1 |  |
| USP31 | ZNF260 | TCF12 |  |
| EXPH5 | SATB2 | CD274 |  |
| LPXN | EEA1 | KIF2A |  |
| WFS1 | HNRNPDL | ROBO2 |  |
| CA2 | RC3H2 | ZNF121 |  |
| ACVR1B | STK38 | MCM4 |  |
| RBM28 | HNRNPF | RDX |  |
| AAED1 | PMEPA1 | SAMD9 |  |
| ATG2B | ZNF551 | HIST1H4C |  |
| CTBP1 | PDE3A | IQGAP1 |  |
| RNF103 | ARPC3 | WNK1 |  |
| RTFDC1 | ZNF830 | SBDS |  |
| RBP1 | ZNF850 | GSE1 |  |
| CHD8 | DYNC1H1 | RAI2 |  |
| PAFAH1B1 | PI15 | PPRC1 |  |
| PITPNA | LRRC8D | KIAA1671 |  |
| PRPF40A | FRS2 | SRCAP |  |
| SOWAHC | SERINC5 | TRPS1 |  |
| REEP3 | DIP2B | ITGA5 |  |
| YTHDF1 | ANKRD50 | FBXO45 |  |
| FAM46C | LCOR | RPUSD4 |  |
| VPRBP | SLC25A25 | SMEK1 |  |
| MCL1 | GOT1 | CCDC93 |  |
| PTPN4 | FAM69A | TMEM43 |  |
| ZDHHC20 | REV1 | NBN |  |
| PGM1 | SOAT1 | SELT |  |
| KIAA1191 | PPP3R1 | HLA-C |  |
| GNA13 | ZFP36 | MYH9 |  |
| CCND2 | ZNF117 | STYX |  |
| CELSR2 | ENTPD6 | TRAF4 |  |
| TBX3 | IQGAP1 | NUDT5 |  |
| NUDT21 | GAN | MED13 |  |
| TAOK2 | WNK1 | SNTB2 |  |
| GCNT4 | RUFY3 | ATP11B |  |
| HNRNPDL | SBDS | PTPN1 |  |
| FKBP14 | PARK7 | PPTC7 |  |
| TM9SF3 | NFIL3 | PPP6C |  |
| STK38 | PBX1 | RAVER2 |  |
| LMBR1 | PREPL | AGO2 |  |
| PCYT1A | PAIP1 | AFF4 |  |
| U2SURP | SRCAP | ATPIF1 |  |
| ALG2 | TRPS1 | STT3A |  |
| ROCK2 | FNBP1L | CSDE1 |  |
| TCF7L1 | LONP2 | DHX30 |  |
| GDF11 | NHLRC3 | DPY19L1 |  |
| NABP1 | FAM110B | FBXL2 |  |
| ZNF148 | MAP4K3 | MCFD2 |  |
| PTTG1IP | ZNF664 | MTMR9 |  |
| NRBP1 | GMNN | MOB1B |  |
| HUWE1 | MEI1 | SERINC3 |  |
| TRPM1 | PIGU | C19orf12 |  |
| FRS2 | ERLIN2 | RNF217 |  |
| USP16 | AKAP1 | CCDC117 |  |
| EPB41L4B | BCL2 | FAM83A |  |
| PTPRD | CPSF6 | RAB21 |  |
| GDF15 | U2AF2 | WEE1 |  |
| FICD | CDKN1B | PCNXL3 |  |
| LCOR | ZNHIT6 | IGF1R |  |
| STK11 | PTPRM | SH3D19 |  |
| PAPOLG | RNF111 | CD164 |  |
| CAMK2N2 | FOXK1 | TMEM41B |  |
| PPP3R1 | HBP1 | LRRC3 |  |
| TOB1 | STYX | ARF1 |  |
| SLC22A3 | TUBB | SERPINH1 |  |
| GAN | MACF1 | KPNA4 |  |
| RUFY3 | XPOT | SERAC1 |  |
| PBX1 | NUP98 | PTMS |  |
| ZFYVE26 | ANKIB1 | TSPAN12 |  |
| OPA3 | RPL38 | TAF4 |  |
| PREPL | PAPOLA | DHX40 |  |
| TRPS1 | ATP6V1D | C6orf48 |  |
| RBM34 | AAGAB | IMPDH2 |  |
| FNBP1L | CAND1 | GNB1 |  |
| FRK | GALNT11 | PA2G4 |  |
| BPTF | STOML2 | PPP2R2D |  |
| TPRG1L | ANKRD17 | EMC3 |  |
| PKD1 | ZHX1-C8orf76 | OR5P2 |  |
| NHLRC3 | UTP20 | PPP2R5C |  |
| TMEM64 | IRF2BP2 | ITM2B |  |
| KLHL20 | PRUNE2 | ASPH |  |
| SLC24A2 | MIB1 | HSBP1 |  |
| C7orf43 | TNKS2 | MAP3K13 |  |
| CCT5 | MRPL48 | SMIM14 |  |
| PIGM | CENPV | VPS26A |  |
| C18orf32 | C19orf12 | ANAPC2 |  |
| C7orf60 | ZNF292 | GBP4 |  |
| CPSF6 | SF3A1 | TJP1 |  |
| APPBP2 | IPPK | ZNF330 |  |
| PDXK | KLHL22 | PDCD6 |  |
| CDKN1B | RAB21 | COPS2 |  |
| CEP120 | GON4L | ACTR3C |  |
| BYSL | SETD5 | HSPH1 |  |
| HBP1 | PCNXL3 | MAGED1 |  |
| STYX | NFYA | KRAS |  |
| CUL1 | RCOR1 | EPDR1 |  |
| SNX9 | TMEM109 | SLC25A40 |  |
| MACF1 | BLMH | FOXN2 |  |
| XPOT | PLXNA1 | WBP2 |  |
| ADNP2 | IGF1R | DDX3X |  |
| ANKIB1 | CD164 | HACE1 |  |
| APH1A | LSM14A | PARS2 |  |
| PPP6C | ASB13 | KIAA1217 |  |
| KCNK2 | FMR1 | S100A11 |  |
| ATP6V1D | RAB12 | SERINC1 |  |
| PXYLP1 | BTBD3 | CNNM2 |  |
| AGO2 | ZYX | RPIA |  |
| AFF4 | ZFHX3 | BDNF |  |
| ITPKB | NACC1 | SHMT2 |  |
| HNRNPA0 | CLTC | GBF1 |  |
| GRHL2 | GABARAP | MTHFD1 |  |
| CSDE1 | CARS | FKBP1A |  |
| IRF2BP2 | VCL | CHD4 |  |
| LMNB1 | PSKH1 | SMARCD1 |  |
| MTMR9 | PRPS1 | FOXRED2 |  |
| TNKS2 | IMPDH2 | ERP44 |  |
| MOB1B | VAPA | ASF1B |  |
| FBLN7 | NDRG1 | TPM3 |  |
| URI1 | ASPH | ZNF770 |  |
| GPATCH2L | SPATS2L | CELF1 |  |
| ELMO2 | MGLL | PDS5B |  |
| RNF217 | ANXA2 | ALKBH5 |  |
| TNFAIP3 | CHD7 | SLC9A6 |  |
| RAB21 | CDK5R1 | AMMECR1L |  |
| WEE1 | CDC40 | KIAA0101 |  |
| SFT2D2 | CD2AP | CANX |  |
| WBSCR22 | ERBB3 | CENPL |  |
| SHCBP1 | PRSS23 | FOXK2 |  |
| CNST | PSAP | PDS5A |  |
| CTDNEP1 | QSER1 | AGPAT5 |  |
| CSTF3 | STT3B | LPP |  |
| OSBPL3 | TAB2 | GIGYF1 |  |
| LSM14A | THAP6 | RCN2 |  |
| MINK1 | VLDLR | TMEM184C |  |
| PIK3C2B | ZBTB6 | ATP5B |  |
| CENPQ | MAGED1 | PRCC |  |
| RPS27A | KRAS | RPLP1 |  |
| MFN2 | DCAF10 | SAFB |  |
| RAB12 | COL3A1 | HADHB |  |
| KPNA2 | IPO7 | SFXN2 |  |
| ZFHX3 | HACE1 | SLC35B3 |  |
| GNAI3 | NAA40 | NHP2L1 |  |
| TMOD3 | IGF2BP1 | INSIG1 |  |
| SERPINE2 | USP54 | SOCS6 |  |
| CLTC | SERINC1 | PAK1 |  |
| SPCS3 | CNNM2 | CBFB |  |
| MAD2L1BP | MARK3 | TP53 |  |
| SQSTM1 | RPIA | TNRC6B |  |
| SLC25A28 | CASP2 | TBC1D16 |  |
| ZNF800 | SHMT2 | COX7C |  |
| VCL | ATP6V1H | PDE4D |  |
| DHX40 | MCM7 | PHF6 |  |
| KLF11 | PHF10 | ZNF197 |  |
| ARHGEF10 | TCP1 | LIMS1 |  |
| MAST2 | PRKCE | USP19 |  |
| TIMP2 | DENND1A | PANK3 |  |
| ETF1 | BUB3 | SURF6 |  |
| PPP2R5C | PPIA | PURB |  |
| RNF138 | ITGB5 | HIF1AN |  |
| NDRG1 | MORF4L2 | PRDM1 |  |
| FEM1C | ZNF337 | PROX1 |  |
| LRIG1 | MED12L | ZNF207 |  |
| CACUL1 | HIST1H2BD | HNRNPK |  |
| PPP1R12B | DST | GRN |  |
| KDM2A | HES1 | AZIN1 |  |
| UBE2J1 | TIPARP | AMD1 |  |
| FAM91A1 | FOXK2 | DYRK2 |  |
| DDX28 | SIKE1 | FBRSL1 |  |
| CDC40 | CAPRIN1 | RBMS1 |  |
| CAV2 | SPIN4 | CCNT1 |  |
| SLC30A7 | TMEM123 | PSMA2 |  |
| PSAP | GIGYF1 | PRR14L |  |
| GOLM1 | NSD1 | CHPF2 |  |
| ATG16L1 | PLEKHA8 | HDDC2 |  |
| AMBRA1 | CCR7 | CRAMP1L |  |
| PPP1R18 | NCL | MAPK1IP1L |  |
| VLDLR | ATP5B | LAPTM4A |  |
| WDR6 | CMTR2 | ACVR2B |  |
| KIF23 | KLF10 | FAM46A |  |
| MAP3K9 | INSIG1 | ABCD3 |  |
| DCAF10 | SOCS6 | AGPAT1 |  |
| IPO7 | MFHAS1 | ATP6V1B2 |  |
| FLAD1 | CUL4A | PCGF5 |  |
| RSRP1 | TNRC6B | RBM8A |  |
| LIPT1 | TUBA1A | SLC7A1 |  |
| GBF1 | LITAF | SERP1 |  |
| PHF10 | ZXDC | IDI1 |  |
| CHD4 | MTURN | FOXP1 |  |
| FZD3 | RICTOR | SCAP |  |
| ZBTB41 | ASH1L | TES |  |
| ZMYM5 | PANK3 | EIF2AK2 |  |
| ZNF770 | METTL23 | ETNK1 |  |
| CCDC71L | EDEM1 | ZNF397 |  |
| ZNF322 | VPS13B | POLR2D |  |
| CELF1 | USP45 | CCDC127 |  |
| VHL | RECK | ZNF217 |  |
| ZNF337 | CTTN | GOLGA7 |  |
| APP | EEF1D | GGA3 |  |
| MED12L | MED1 | LARP1 |  |
| RABEP1 | CDC42BPG | DMWD |  |
| MARCH7 | RALGPS2 | MAL2 |  |
| TAOK1 | DYRK2 | DMD |  |
| TBC1D30 | ALKBH1 | CNIH1 |  |
| ABHD2 | TEX2 | POP7 |  |
| F3 | ZNF253 | YIPF4 |  |
| DPP9 | HECTD1 | CDH1 |  |
| SIKE1 | EIF5 | KIAA1432 |  |
| MICB | SLC2A3 | FECH |  |
| IER3 | IDI1 | DDIT4 |  |
| FJX1 | BLVRA | SFXN1 |  |
| NCOA3 | CD48 | NFAT5 |  |
| ZNF622 | GDA | CHMP2B |  |
| SLC41A1 | NXF1 | PPP1R12A |  |
| IFNAR2 | PSD3 | TET3 |  |
| TMEM123 | NAA50 | ADAM20 |  |
| GIGYF1 | LARP1 | SPAG1 |  |
| ATP2B1 | CEP192 | SLC5A3 |  |
| ANLN | STK17B | ZBED6 |  |
| PIP4K2A | NCAM2 | TEX10 |  |
| USP28 | KIF3B | NECAP1 |  |
| KLF10 | MAL2 | SLIT2 |  |
| TMEM181 | DERL2 | EEF2 |  |
| RPS6KA5 | PMAIP1 | AR |  |
| SOCS6 | TSKU | KCTD13 |  |
| TNRC6B | CERS2 | POLR2M |  |
| SPTY2D1 | CDH1 | DNAL1 |  |
| AGFG2 | DENND5A | PDLIM1 |  |
| RASD1 | PDHA1 | B4GALT1 |  |
| PANK3 | SMC4 | ALG10B |  |
| SRSF1 | ZFX | ZNF711 |  |
| PURB | PPP1R12A | FBXO28 |  |
| POLE | RPL35A | NCS1 |  |
| RHOC | SLC5A3 | CCND1 |  |
| SLC35F5 | ATP5G3 | IMPAD1 |  |
| PNKD | RIF1 | PFN2 |  |
| SGMS1 | RPP25L | LHFPL2 |  |
| SDHAF2 | GGA2 | SMAD4 |  |
| SIPA1L1 | PCNX | FNDC3B |  |
| STC1 | SMG9 | EFR3A |  |
| ATP9A | EEF2 | PUM1 |  |
| POSTN | AR | MSH6 |  |
| DYRK2 | POLR2A | CCNE2 |  |
| TSG101 | BTG2 | NR3C1 |  |
| ZNF490 | POLR2M | TAPBP |  |
| ARL4C | FBN1 | PHLDB2 |  |
| EZH1 | PNN | LYRM2 |  |
| PRR14L | ZNF711 | PIGC |  |
| RGMA | SYBU | MYLIP |  |
| LAPTM4A | PTPN6 | ASPM |  |
| FAM46A | RBMS2 | PRRG1 |  |
| MAN1A2 | FAM208B | C2orf44 |  |
| EIF5 | TOP2A | POGK |  |
| ARHGAP35 | TCEB2 | ALPI |  |
| SERP1 | LHFPL2 | RAPGEF2 |  |
| SLC2A3 | SLC35D1 | ADPGK |  |
| NLK | FNDC3B | LRRC58 |  |
| SOGA1 | SEPHS1 | HIF1A |  |
| RABGGTB | EFR3A | SACS |  |
| ZNF134 | ZNF678 | VPS37A |  |
| ZBTB37 | SPEN | TMEM97 |  |
| LCORL | VTI1B | STAT2 |  |
| GDA | RAE1 | PAG1 |  |
| BRCA1 | WDR76 | FOSB |  |
| ZNF217 | MAPRE2 | CSNK1A1 |  |
| DAPK3 | PLEKHB2 | DNAJC13 |  |
| JOSD1 | KCTD2 | SLC29A1 |  |
| GGA3 | QARS | AP5B1 |  |
| ARL1 | DOCK1 | SUPT16H |  |
| SALL3 | PBX3 | FOXN3 |  |
| CROT | TMEM19 | IRS4 |  |
| ZNF385A | H2AFY | MYC |  |
| PSD3 | RAPGEF2 | OTUD5 |  |
| LIF | RNPS1 | HCFC1 |  |
| LARP1 | MSL1 | AHCTF1 |  |
| STK17B | LRRC58 | ANKRD12 |  |
| LDLRAP1 | COL4A2 | MTCH1 |  |
| CRTC2 | HIF1A | TP53INP1 |  |
| CNIH1 | PPP1R10 | POLR1B |  |
| PKIB | HELZ | DIAPH1 |  |
| NDE1 | SMARCA5 | PTP4A2 |  |
| RNF145 | NUP107 | C21orf91 |  |
| TGFB1I1 | RGMB | EIF3A |  |
| PDIA4 | VPS37A | THOC5 |  |
| CUL5 | MAPK8 | RBM19 |  |
| MFSD9 | GLUD2 | ZFP36L1 |  |
| TET3 | UBE3A | GOLGA4 |  |
| MAPK9 | RQCD1 | GPBP1L1 |  |
| CRYBG3 | RNASEK-C17orf49 | BLOC1S5-TXNDC5 |  |
| PKP4 | KIDINS220 | UMPS |  |
| BBIP1 | DNMT1 | STK35 |  |
| TRIP10 | IRS4 | LLGL1 |  |
| POLR2A | PPP6R3 | TBCEL |  |
| PHC3 | THOC7 | PCBP1 |  |
| NSUN7 | HOXA5 | SLC16A1 |  |
| ENO1 | LIMK2 | EIF4A2 |  |
| CCDC51 | PBRM1 | MTPN |  |
| ALG10B | SON | ZNF460 |  |
| JUN | AHCTF1 | ABHD4 |  |
| MFN1 | CSTF1 | TMED10 |  |
| PIK3R3 | CTDSPL | COG8 |  |
| HCN1 | AHDC1 | SRPR |  |
| SYBU | DOCK5 | FRMD6 |  |
| PPP1R15B | SMIM15 | KIAA1462 |  |
| CLINT1 | PPM1A | VCP |  |
| TXLNA | MYO9A | TTC3 |  |
| PCDHGB6 | PSAT1 | VANGL2 |  |
| CCND1 | SSTR2 | AARS |  |
| IMPAD1 | PRELID1 | TSPAN6 |  |
| PFN2 | RPS24 | COMMD8 |  |
| WDR82 | MTMR1 | C11orf58 |  |
| EPHB4 | DEPDC1 | MUC5B |  |
| USP32 | TP53INP1 | AHCYL1 |  |
| SEPHS1 | RNASEK | NSA2 |  |
| ICMT | MECP2 | XYLT2 |  |
| UNK | ZFP36L1 | KDM3B |  |
| ZNF678 | UBA1 | RNMT |  |
| ACTR3 | DEGS1 | CHTOP |  |
| PPT1 | KIFC1 | SNX16 |  |
| CRY2 | ZFAND1 | PDE12 |  |
| TMEM56 | STMN2 | C5orf51 |  |
| ATP1B3 | RRAGA | FER |  |
| GFPT1 | E2F6 | TRIM33 |  |
| FASTK | SKIL | PSMC4 |  |
| SSFA2 | TFRC | GTF3A |  |
| SBNO1 | FLNB | SFPQ |  |
| MYLIP | VIM | ITPR1 |  |
| FEZ2 | TMED10 | EI24 |  |
| ARL6IP1 | SLC25A24 | RPS18 |  |
| PRRG1 | ATRX | TCF20 |  |
| NPEPPS | CBX6 | BAZ2A |  |
| ZNF264 | ZNF773 | USO1 |  |
| PGBD4 | ZNF614 | PLEKHG5 |  |
| MXI1 | MOGS | CPEB2 |  |
| H2AFY | HOXB9 | CDAN1 |  |
| NUFIP2 | WASF2 | YKT6 |  |
| RUNX3 | GMPS | ERICH1 |  |
| WBP1L | BEND3 | SLC25A36 |  |
| NFATC2IP | BAZ1A | NAA30 |  |
| DUSP18 | AK3 | VTI1A |  |
| COL4A2 | MUC5B | MBD6 |  |
| SOCS1 | DDX46 | MTA2 |  |
| CISH | SVIP | ZC3HAV1 |  |
| PITRM1 | ZC3H13 | AGPAT6 |  |
| RGMB | HIST1H2BG | KLHL15 |  |
| C2CD2 | KDM3B | NUAK2 |  |
| BTN3A2 | JMJD1C | DNM1L |  |
| DMXL1 | GBAS | LARP4 |  |
| SEC14L1 | ZNF175 | SEC31A |  |
| MAPK8 | FLNA | MIF |  |
| PKMYT1 | TRIM33 | PTPRJ |  |
| RIT1 | TGOLN2 | ZNF74 |  |
| CSNK1A1 | PTGS2 | RAC1 |  |
| DNAJC13 | RNF20 | KLHL23 |  |
| RABIF | HIST1H4H | STC2 |  |
| MKRN1 | PABPC1 | MSL3 |  |
| LNPEP | APBA2 | FGF2 |  |
| F2R | NOL11 | SHOC2 |  |
| FAM134C | PNRC2 | KMT2D |  |
| CXorf38 | CHIC1 | HSPA9 |  |
| SUPT16H | ANKRD27 | SKIV2L |  |
| PPP6R3 | CSNK2A1 | IPO4 |  |
| DEDD | KDM5A | EIF2B1 |  |
| TMEM209 | RPL5 | SESN2 |  |
| SMU1 | CPEB2 | ABCG1 |  |
| UBE3C | RORA | TNFRSF10B |  |
| NR2C2 | TMEM246 | TSNAX |  |
| PARVA | PRR12 | CHD2 |  |
| CENPF | H2AFY2 | NLGN1 |  |
| TRIM3 | GLCCI1 | PLXNB1 |  |
| AHCTF1 | ZNF708 | EEF1G |  |
| STRN4 | PSMB2 | GEMIN7 |  |
| COPS3 | MTA2 | ELAVL1 |  |
| PLEKHO2 | ADRA2C | ZBTB21 |  |
| USP21 | RGS2 | CCDC50 |  |
| TP53INP1 | TMPO | ARSG |  |
| CMKLR1 | SRRM2 | ZC3H11A |  |
| MRPS2 | DLGAP5 | ADNP |  |
| POLR1B | RPAP1 | C6orf120 |  |
| DIAPH1 | EEF1A1 | PSEN1 |  |
| TMEM9B | DDX5 | HMGN5 |  |
| CLIP4 | BACE2 | NAA11 |  |
| ZFP36L1 | PTPRJ | LSM11 |  |
| DBNL | MTHFD2L | SMARCD2 |  |
| KLF3 | PRKAA1 | SLC50A1 |  |
| ATXN1 | PTP4A1 | ABCB7 |  |
| LRRC32 | FGF2 | JAG1 |  |
| DENND5B | ADAMTS1 | RBPJ |  |
| NMD3 | KIAA0226 | FAM13B |  |
| PPP2R1A | UBE2K | RNF146 |  |
| ZFAND1 | THAP2 | FNIP1 |  |
| TBCEL | BCORL1 | UCHL3 |  |
| IGF2R | MCUR1 | TNRC18 |  |
| BEND4 | DOLK | ZNF451 |  |
| CYP2U1 | PPP1R9B | CNOT2 |  |
| UBAP1 | SESN2 | BBS10 |  |
| SOCS5 | PGAM1 | GFM1 |  |
| SKIL | RNMTL1 | MBNL2 |  |
| VIM | YRDC | ILF2 |  |
| DAPK1 | KIAA1107 | SLC20A1 |  |
| DYRK3 | TNFRSF10B | ARID4B |  |
| NKIRAS1 | PIK3C2A | NFE2L1 |  |
| ZRANB3 | CHD2 | ERC1 |  |
| FCHO2 | MPI | CDK19 |  |
| FRMD6 | TSC22D2 | LAMP2 |  |
| DMTF1 | PYGO2 | PRKAR1A |  |
| ARNTL2 | PPM1F | FAM160B1 |  |
| ZC3H12C | COPG1 | POLR3G |  |
| GLO1 | TMEM2 | AMOTL2 |  |
| VCP | DHX15 | PGRMC2 |  |
| CBX6 | DYNLL2 | TMEM245 |  |
| ECT2 | BCL2L12 | GTF2H3 |  |
| WASF2 | TRIM4 | NCAPH |  |
| EGLN3 | ZC3H11A | PLAG1 |  |
| PRNP | HSPA8 | ZNF780A |  |
| ZFYVE9 | TOPBP1 | REV3L |  |
| ZBTB5 | STRN | PSMD7 |  |
| LRP1 | ACTRT3 | BRD3 |  |
| SLC38A2 | FUT9 | PDGFC |  |
| NCOR1 | SMARCD2 | ZNF281 |  |
| CENPB | KIAA0100 | COX15 |  |
| ABHD5 | NIFK | PHF12 |  |
| RAB18 | ZNF398 | EIF4E2 |  |
| CSRNP3 | KLF8 | CREB3L2 |  |
| RPL11 | DSG2 | GAPVD1 |  |
| HNRNPM | STRADB | SOD2 |  |
| SMAD5 | HINT3 | KIAA0040 |  |
| ZBED3 | SPSB1 | TRAPPC10 |  |
| ZNF138 | TFDP1 | GSTK1 |  |
| TBCC | HIVEP1 | FKBP15 |  |
| SUSD1 | SP1 | SNX13 |  |
| KCMF1 | ARID5B | CDC27 |  |
| MRPL17 | INCENP | KPNA6 |  |
| RPS6KA6 | DUSP3 | VASP |  |
| PABPC1 | RBPJ | GNB2L1 |  |
| CFL2 | CSNK1G1 | SLC16A7 |  |
| MRPL10 | PROSC | SLC1A4 |  |
| PIK3R1 | GTPBP2 | MYO10 |  |
| ZNF362 | MRPL24 | C5orf24 |  |
| RB1 | MAT2A | ABAT |  |
| CHIC1 | GNPTAB | NTN4 |  |
| SKI | CNOT2 | PDIK1L |  |
| ETV1 | ARRDC3 | MARCH5 |  |
| TMCC1 | BBS10 | MVD |  |
| RORA | MBNL2 | C14orf28 |  |
| SLC22A23 | SLC20A1 | SREK1IP1 |  |
| PHC2 | ARID4B | PCMTD1 |  |
| ZMPSTE24 | RAI14 | MKKS |  |
| YWHAZ | LMAN1 | ACTR1A |  |
| YLPM1 | PRKAR1A | PLEKHA1 |  |
| CUL7 | PEF1 | KIAA0368 |  |
| NAA30 | VMA21 | LRRC1 |  |
| REXO2 | MTRR | NSF |  |
| ZNF592 | PLIN2 | BZW1 |  |
| PEX5L | BROX | APOL2 |  |
| SEMA4C | EP300 | ANKRD28 |  |
| TMPO | RP11-210M15.2 | RAB22A |  |
| KLHL15 | AMOTL2 | RBM12B |  |
| METTL21A | DDAH1 | UHMK1 |  |
| SENP1 | GAB1 | PKD2 |  |
| DDX5 | PGRMC2 | JRK |  |
| ASCC3 | MGEA5 | TNRC6A |  |
| CUX1 | PRIMA1 | MAP3K2 |  |
| ZBTB43 | ZCCHC14 | USP9X |  |
| TIPRL | SLC44A1 | MBNL1 |  |
| C6orf62 | TP53BP1 | NFIA |  |
| ANKRD13C | FAM73A | MON2 |  |
| DUSP8 | PUM2 | ZFHX4 |  |
| HKR1 | AHR | SRSF11 |  |
| LDLRAD3 | SH2D4A | OXR1 |  |
| RNF219 | KIF20B | ZRANB1 |  |
| KDM6B | STON2 | AVL9 |  |
| BCORL1 | DPH5 | ATG9A |  |
| IPO5 | ZNF281 | MLXIP |  |
| SH3RF1 | USP14 | ANKEF1 |  |
| SCO1 | WHSC1 | ZBTB1 |  |
| CS | PHF12 | ZIK1 |  |
| TAGAP | CREB3L2 | PEX12 |  |
| TNFRSF10B | FOXP2 | GORASP2 |  |
| CHD2 | RPL37A | PTPN12 |  |
| FAM199X | SEC24B | AASDHPPT |  |
| KIAA0247 | MPHOSPH9 | CCNI |  |
| SSX2IP | CAPN1 | PCBP2 |  |
| ZBTB21 | PAPD4 | AHNAK |  |
| ZC3H11A | CEP170 | TRPM7 |  |
| ADNP | TNS3 | LUZP1 |  |
| C6orf120 | DNAH14 | YTHDF3 |  |
| NF1 | ARCN1 | ZBTB34 |  |
| JPH1 | HNRNPH1 | SMAD7 |  |
| TMEM219 | CCNE1 | CHRNA5 |  |
| ZNF398 | CCDC88C | TMEM127 |  |
| EIF2S1 | S100Z | RAN |  |
| RANBP2 | SLC16A7 | PDE7A |  |
| SUV420H1 | SEC23IP | TSN |  |
| SLC16A6 | FASTKD5 | ARPC4 |  |
| SP1 | PFKM | ZFP36L2 |  |
| USPL1 | RBX1 | OSBPL8 |  |
| B4GALT3 | SLC6A9 | NASP |  |
| ABCB7 | ZNF257 | KHNYN |  |
| COL1A2 | LAPTM4B | NFYC |  |
| RBPJ | CREB3L1 | NKRF |  |
| MDM4 | KLHL9 | ULK1 |  |
| SEMA4B | UBE2G1 | MAGT1 |  |
| LRPAP1 | CEP162 | DYRK1A |  |
| SLC39A6 | RLIM | UQCRC1 |  |
| ZNF451 | ZNF644 | FUT8 |  |
| RASSF3 | SMYD3 | KLHL24 |  |
| TNKS1BP1 | SNW1 | ALDOA |  |
| BBS10 | MRPL28 | CMTR1 |  |
| GFM1 | KIAA1244 | NR1D2 |  |
| STX6 | LIN7A | CLDN12 |  |
| ILF2 | RPN2 | EXOC8 |  |
| PRKAB2 | KCNG3 | ZNF574 |  |
| PEX13 | GOLGB1 | G2E3 |  |
| ARID4B | UBAP2L | FAM111A |  |
| LAMC1 | DNHD1 | SUCO |  |
| RPS6KA3 | CTTNBP2NL | U2AF1 |  |
| TRAPPC2 | SLC7A2 | UNC119 |  |
| FOXJ3 | STARD7 | B3GNT2 |  |
| MKI67 | BASP1 | GTF2A1 |  |
| RRP1B | ABHD3 | EPHA4 |  |
| LMAN1 | RRP12 | UNC13B |  |
| TGFBR3 | PKN2 | TMEM168 |  |
| PRKAR1A | AKAP12 | TMEM170A |  |
| FAM160B1 | MCCC2 | PHIP |  |
| CAPN9 | BAG6 | PTEN |  |
| POLR3G | UHMK1 | ZNF652 |  |
| MIDN | DCAF15 | NFATC3 |  |
| SUN1 | TNRC6A | TRAM1 |  |
| ZNF714 | TP53INP2 | SGK3 |  |
| BTG3 | MBNL1 | LATS1 |  |
| TMEM245 | ZFHX4 | FOXO1 |  |
| MGEA5 | ATP2B4 | NFIC |  |
| FA2H | CNEP1R1 | CAB39 |  |
| TAX1BP1 | TNFAIP1 | PCYOX1 |  |
| RPUSD3 | CHAMP1 | RAD17 |  |
| ZBTB7A | LRR1 | TRIB1 |  |
| PLAG1 | CARM1 | QPCTL |  |
| PUM2 | MRPL42 | MAPK1 |  |
| NFIB | EIF4EBP2 | PAX9 |  |
| PIAS4 | RRM2 | BRF2 |  |
| AKT3 | SESN3 | EXOG |  |
| RSBN1L | LDLR | LATS2 |  |
| CELSR3 | TPT1 | ABL2 |  |
| PIAS2 | CCRN4L | GNG5 |  |
| MRE11A | SMPD1 | RANBP9 |  |
| FBXW2 | GID4 | TET2 |  |
| PCNP | TMEM189 | GAS1 |  |
| WDR3 | PHF13 | HELLS |  |
| DPH5 | PCBP2 | GTSE1 |  |
| WHSC1 | ID3 | SERTAD2 |  |
| KAT7 | HIPK1 | SERBP1 |  |
| PHF12 | AHNAK | CBX3 |  |
| ALKBH4 | YES1 | KLF6 |  |
| EPM2AIP1 | RAB11B | TNPO3 |  |
| CKAP4 | YTHDF3 | WDR5B |  |
| POLQ | PRKDC | RNF139 |  |
| AKAP5 | ZBTB34 | TMEM165 |  |
| ZFYVE20 | SMAD7 | STK40 |  |
| BRD1 | LEPR | KPNB1 |  |
| CLPTM1 | PDE7A | RHOB |  |
| GRAMD1A | ZDHHC17 | CBX5 |  |
| RNF167 | ZFP36L2 | DMKN |  |
| RBBP7 | ARHGEF7 | GATA6 |  |
| SOD2 | DLAT | GOLPH3 |  |
| TRAPPC10 | HIST1H1B | GPRIN3 |  |
| IGFBP3 | NCKAP1 | EIF1 |  |
| ZNF81 | GATAD1 | TTC6 |  |
| LONRF2 | MOAP1 | RAB5B |  |
| ZBTB33 | KLHL24 | RNF126 |  |
| CEP57 | AIMP2 | GOLIM4 |  |
| FBXO31 | ALDOA | NIN |  |
| PPP1R3B | NR1D2 | PLCB4 |  |
| SCD | RSPO3 | YBX3 |  |
| ACSL4 | HSPA1B | EIF4A1 |  |
| SDC2 | LPHN1 | PCMT1 |  |
| RLIM | C11orf68 | BAZ1B |  |
| SEMA7A | SPIN1 | SMG1 |  |
| BCDIN3D | PDZD8 | PNISR |  |
| NAPB | PBX2 | ARHGAP12 |  |
| FAM102A | CNOT6L | BCL2L11 |  |
| OCRL | ZNF518A | CLOCK |  |
| ZNF704 | ZNF22 | ZNF703 |  |
| GOLGB1 | B3GNT2 | TBRG1 |  |
| BAMBI | ZNF618 | KIF5B |  |
| UBAP2L | GTF2A1 | HLA-A |  |
| SGTB | TRIM71 | CCDC6 |  |
| MEX3D | TMEM170A | AJUBA |  |
| LIMK1 | PCF11 | SOBP |  |
| LASP1 | SCARB1 | KCTD20 |  |
| SEC22C | SGK3 | R3HDM2 |  |
| IGSF3 | DDIT3 | MIER3 |  |
| FGD4 | SPTBN1 | VAMP2 |  |
| PXDN | HNRNPUL1 | MDH1 |  |
| RAB22A | FOXO1 | MPV17L2 |  |
| AKTIP | HDHD2 | DSP |  |
| USP7 | DAAM1 | SEC11A |  |
| MATR3 | CAP1 | KDELR2 |  |
| ROBO1 | ADAMTS9 | COA7 |  |
| ENPP5 | MAP3K7 | EFNA1 |  |
| TMEM30A | FNDC3A | TXNIP |  |
| RBM12B | NUPL1 | HIST1H4J |  |
| CDKN1A | TLN1 | HIST1H3B |  |
| UHMK1 | FBXW11 | HIST1H2BO |  |
| NAPEPLD | PPP2R1B | HIST1H4E |  |
| PKD2 | GREB1 | NEFL |  |
| SYNE2 | TMPPE | HIST1H3G |  |
| SAMD12 | CSF1 | MYO19 |  |
| AAK1 | H1F0 | BRD4 |  |
| TNRC6A | ZHX1 | RASSF5 |  |
| TP53INP2 | HMMR |  |  |
| MAP3K2 | NKIRAS2 |  |  |
| HMCES | CCNG2 |  |  |
| IRX3 | GCNT1 |  |  |
| PRC1 | KIAA0895 |  |  |
| WDR4 | VAT1 |  |  |
| WDR43 | SLFN5 |  |  |
| NFIA | UBE4B |  |  |
| LTBP1 | PCM1 |  |  |
| OXR1 | REEP5 |  |  |
| ZRANB1 | PARD6B |  |  |
| KIAA0930 | PDHB |  |  |
| SEMA6D | ARF4 |  |  |
| MAP3K8 | TMUB2 |  |  |
| TNFAIP1 | ZCCHC24 |  |  |
| MRPL44 | RNF214 |  |  |
| ZBTB18 | DNAJC2 |  |  |
| SYTL4 | MAPKAPK2 |  |  |
| RRM2 | RNF139 |  |  |
| SMG7 | STK40 |  |  |
| LDLR | KPNB1 |  |  |
| TMEM25 | RHOB |  |  |
| PRDX6 | C19orf24 |  |  |
| MYL6 | SIM2 |  |  |
| ZBTB4 | BRWD1 |  |  |
| BCL11B | CBX5 |  |  |
| BCOR | NOP58 |  |  |
| CUL3 | TBL1XR1 |  |  |
| BTBD7 | JMJD6 |  |  |
| RUFY2 | RAB3C |  |  |
| ATP2A2 | BAZ2B |  |  |
| HSD17B4 | DHX36 |  |  |
| YTHDF3 | IREB2 |  |  |
| SASH1 | CCP110 |  |  |
| ZBTB34 | MEF2A |  |  |
| SH2B1 | GRSF1 |  |  |
| MANBA | GPRIN3 |  |  |
| AP1G1 | SLC39A1 |  |  |
| PAFAH1B2 | RAB14 |  |  |
| UBE2W | MTRNR2L8 |  |  |
| TMEM127 | PRRC2A |  |  |
| RAN | ETFA |  |  |
| MKNK2 | ARHGAP5 |  |  |
| ZNF367 | MBOAT2 |  |  |
| ZDHHC17 | RAPH1 |  |  |
| OSBPL8 | KIAA0141 |  |  |
| NCKAP1 | AKAP11 |  |  |
| NUPL2 | MDM2 |  |  |
| GPR157 | GOLIM4 |  |  |
| ABCC5 | MTDH |  |  |
| ULK1 | TNRC6C |  |  |
| MAGT1 | SCFD1 |  |  |
| DYRK1A | KIAA1033 |  |  |
| SNX25 | DPY19L3 |  |  |
| WIPI2 | PCMT1 |  |  |
| ZNF202 | RITA1 |  |  |
| TMX3 | TMBIM6 |  |  |
| PTAR1 | GINM1 |  |  |
| MOB1A | ZW10 |  |  |
| IQSEC2 | EIF4G2 |  |  |
| VCPIP1 | BCL2L11 |  |  |
| RNF125 | CLOCK |  |  |
| SUCO | KIF5B |  |  |
| UBE2B | CCDC6 |  |  |
| SAMD9L | ZNF740 |  |  |
| CLSTN1 | ZDHHC7 |  |  |
| DKK3 | GMPR2 |  |  |
| RYBP | ABCF1 |  |  |
| USP3 | ANKMY2 |  |  |
| SYMPK | USP34 |  |  |
| RND3 | MOSPD2 |  |  |
| VAV3 | MIER3 |  |  |
| RAB11FIP1 | VAMP2 |  |  |
| LSM14B | FAU |  |  |
| CEP290 | DHX33 |  |  |
| EPHA4 | FAM134B |  |  |
| VEGFA | SMPD4 |  |  |
| PTEN | PPP1CB |  |  |
| NSMAF | POLH |  |  |
| ZC3H4 | FAM46B |  |  |
| TUBB4B | DSP |  |  |
| PALLD | KDELR2 |  |  |
| PI3 | KIAA1586 |  |  |
| ATL3 | ABRACL |  |  |
| NFIC | GSPT1 |  |  |
| RNF213 | COA7 |  |  |
| ADAMTS9 | ADCY6 |  |  |
| BBX | EFNA1 |  |  |
| SCML2 | RMND5A |  |  |
| MAPK1 | ZCCHC3 |  |  |
| LAMTOR1 | TXNIP |  |  |
| NIPBL | CSNK2A3 |  |  |
| SLAIN2 | MARCKS |  |  |
| NUPL1 | ZNF792 |  |  |
| HAUS8 | VAMP3 |  |  |
| MTMR3 | SYNRG |  |  |
| TLN1 | GPR179 |  |  |
| NUP205 | MLLT6 |  |  |
| TFAP2C | CTDSP2 |  |  |
| MAPK6 | BRD4 |  |  |
| MED6 |  |  |  |
| PTGFRN |  |  |  |
| CHD9 |  |  |  |
| PRDX3 |  |  |  |
| GREB1 |  |  |  |
| ABL2 |  |  |  |
| EXOC1 |  |  |  |
| ZHX1 |  |  |  |
| SERPINE1 |  |  |  |
| SLC40A1 |  |  |  |
| DNAJC27 |  |  |  |
| KMT2C |  |  |  |
| CYBRD1 |  |  |  |
| PIP4K2C |  |  |  |
| FAM84B |  |  |  |
| CCNG2 |  |  |  |
| GAK |  |  |  |
| CCDC137 |  |  |  |
| BAP1 |  |  |  |
| IL17RD |  |  |  |
| REEP5 |  |  |  |
| FAM129A |  |  |  |
| CRISPLD2 |  |  |  |
| THAP7 |  |  |  |
| TNPO3 |  |  |  |
| FRMPD4 |  |  |  |
| GPR107 |  |  |  |
| GPR176 |  |  |  |
| RNF139 |  |  |  |
| KPNB1 |  |  |  |
| TTPAL |  |  |  |
| DMKN |  |  |  |
| ZNF880 |  |  |  |
| WDR37 |  |  |  |
| PSMC1 |  |  |  |
| HYOU1 |  |  |  |
| TUBD1 |  |  |  |
| TGFBR2 |  |  |  |
| MFAP3L |  |  |  |
| GRSF1 |  |  |  |
| IRF1 |  |  |  |
| TFG |  |  |  |
| NHLH2 |  |  |  |
| ARHGAP5 |  |  |  |
| MBOAT2 |  |  |  |
| C8orf34 |  |  |  |
| JAK1 |  |  |  |
| RAB5B |  |  |  |
| MAF1 |  |  |  |
| CAMK2N1 |  |  |  |
| AKAP11 |  |  |  |
| MDM2 |  |  |  |
| COQ2 |  |  |  |
| CMPK1 |  |  |  |
| PRR5 |  |  |  |
| SCML1 |  |  |  |
| RNF216 |  |  |  |
| NIPA1 |  |  |  |
| RABL6 |  |  |  |
| DPY19L3 |  |  |  |
| FAM169A |  |  |  |
| KDM4C |  |  |  |
| ARHGAP12 |  |  |  |
| GINM1 |  |  |  |
| EIF4G2 |  |  |  |
| FAM117A |  |  |  |
| PRR15 |  |  |  |
| RASL11B |  |  |  |
| MTF1 |  |  |  |
| AJUBA |  |  |  |
| ZHX3 |  |  |  |
| RNH1 |  |  |  |
| SOBP |  |  |  |
| MYO1B |  |  |  |
| ZYG11A |  |  |  |
| DNPH1 |  |  |  |
| PRRX1 |  |  |  |
| SIN3A |  |  |  |
| ANKMY2 |  |  |  |
| CDC42BPB |  |  |  |
| PHLDA1 |  |  |  |
| USP34 |  |  |  |
| TRMT12 |  |  |  |
| PRKACB |  |  |  |
| MOSPD2 |  |  |  |
| MAP1B |  |  |  |
| CTGF |  |  |  |
| KIAA1430 |  |  |  |
| SLC30A1 |  |  |  |
| UBR4 |  |  |  |
| NACC2 |  |  |  |
| TTC9 |  |  |  |
| BNIP2 |  |  |  |
| RIMKLA |  |  |  |
| CAPN7 |  |  |  |
| PANK1 |  |  |  |
| KDELR2 |  |  |  |
| SMOC1 |  |  |  |
| GSPT1 |  |  |  |
| COA7 |  |  |  |
| TXNIP |  |  |  |
| KMT2B |  |  |  |
| GGNBP2 |  |  |  |
| PILRB |  |  |  |
| OTUD7B |  |  |  |
| NUDT3 |  |  |  |
| SNX12 |  |  |  |
| MYO19 |  |  |  |
| ZFP91 |  |  |  |
| MLLT6 |  |  |  |
| ORAI1 |  |  |  |
| CPNE1 |  |  |  |
